# Supplementary material
Source: PubMed Central journal article supplement (PMC6390925)
Supplement: CJN.08750718SupplementaryData.pdf [file CJN.08750718SupplementaryData.pdf]

## **Supplementary Material**

### **Integration of Genetic Testing and Pathology for the Diagnosis of Adults with FSGS**

\*Tony Yao<sup>1,2</sup>, \*Khalil Udwan, MD PhD<sup>1,2</sup>, Rohan John MD<sup>3</sup>, Akanchaya Rana, MD<sup>1,2,4</sup>, Amirreza Haghighi, MD<sup>1</sup>, Lizhen Xu, PhD<sup>5</sup>, Saidah Hack, BSc<sup>1,2</sup>, Heather N. Reich, MD PhD<sup>1,2,4,6</sup>, Michelle Hladunewich, MD MSc<sup>7</sup>, Daniel Cattran, MD<sup>1,2,4,6</sup>, Andrew D. Paterson, MD<sup>4,6,8,9</sup>, +York Pei, MD MSc<sup>1,2,4,6</sup>, +Moumita Barua, MD<sup>1,2,4,6</sup>

\*,+ These authors contributed equally to this work

<sup>1</sup>Division of Nephrology, University Health Network, Toronto, Canada

<sup>2</sup>Toronto General Hospital Research Institute, Toronto General Hospital, Toronto, Canada

<sup>3</sup>Department of Pathology, University Health Network, Toronto, Canada

<sup>4</sup>Institute of Medical Sciences, University of Toronto, Canada

<sup>5</sup>The Centre for Applied Genomics, The Hospital for Sick Children's, Toronto, Canada

<sup>6</sup>Department of Medicine, University of Toronto, Canada

<sup>7</sup>Division of Nephrology, Sunnybrook Health Sciences Center, Toronto, Canada

<sup>8</sup>Genome and Genome Biology, The Hospital for Sick Children's, Toronto, Canada

<sup>9</sup>Epidemiology & Biostatistics, Dalla Lana School of Public Health, University of Toronto

Correspondence:

Dr. Moumita Barua

200 Elizabeth Street, 8NU-855

Toronto General Hospital

Toronto, ON

M5G 2C4

416-340-4800 ext 8007

(F) 416-340-3999

moumita.barua@uhn.ca

*Supplemental material is neither peer-reviewed nor thoroughly edited by CJASN. The authors alone are responsible for the accuracy and presentation of the material.*

**Table of Contents:**

**Supplemental Table 1. Additional Baseline Clinical Characteristics of the Sequenced Cohort.**

**Supplemental Table 2. List of Genes Associated with FSGS and Related Phenotypes.**

**Supplemental Table 3. Likely Pathogenic Variants in *COL4A* Genes.**

**Supplemental Table 4. Likely Pathogenic Variants in non-*COL4A* Genes.**

**Supplemental Table 5. Possibly Pathogenic Variants.**

**Supplemental Table 6. Previously Reported Variants with Uncertain Pathogenic Significance.**

**Supplemental Table 7. Additional Clinical Characteristics for Patient Subgroups.**

**Supplemental Table 8. Tables demonstrating ages at disease onset and estimated mean survival/age of kidney failure by subgroup, with sexes analyzed separately.**

**Supplemental Table 9. Clinical characteristics of *COL4A*, other genetic cause and no proven genetic cause subgroups.**

**Supplemental Figure 1. Pedigrees of families with definitely pathogenic variants.**

Supplemental material is neither peer-reviewed nor thoroughly edited by CJASN. The authors alone are responsible for the accuracy and presentation of the material.

**Supplementary Table 1. Additional Baseline Clinical Characteristics of the Sequenced Cohort.**

|                                                                                              | Percentage (%) of Available Data | Number of Patients                 |
|----------------------------------------------------------------------------------------------|----------------------------------|------------------------------------|
| Age of onset of kidney disease (years) (% of available data)                                 |                                  | 161                                |
| 0-12                                                                                         | 10                               | 17                                 |
| 12-18                                                                                        | 6                                | 9                                  |
| >18                                                                                          | 84                               | 135                                |
| Proteinuria at onset                                                                         |                                  | 126                                |
| Dipstick positive                                                                            | 32                               | 40                                 |
| 300 mg-2 g/ 24 hours                                                                         | 12                               | 15                                 |
| > 2 g/24 hours                                                                               | 56                               | 71                                 |
| Nadir plasma albumin (g/dl) (% of available data)                                            |                                  | 128                                |
| >35                                                                                          | 43                               | 56                                 |
| 30-34                                                                                        | 20                               | 25                                 |
| 25-29                                                                                        | 13                               | 17                                 |
| 20-24                                                                                        | 8                                | 10                                 |
| <19                                                                                          | 16                               | 20                                 |
| FSGS histologic subtype                                                                      |                                  |                                    |
| Not otherwise specified                                                                      | 80                               | 126                                |
| Tip                                                                                          | 8                                | 126                                |
| Perihilar                                                                                    | 7                                | 126                                |
| Collapsing                                                                                   | 2                                | 126                                |
| Cellular                                                                                     | 1                                | 126                                |
| Inadequate to classify                                                                       | 2                                | 126                                |
| Progression to kidney failure from disease onset (years) (% of patients with kidney failure) |                                  | 71                                 |
| < 5 years                                                                                    | 24                               | 17                                 |
| 5-10 years                                                                                   | 31                               | 22                                 |
| > 10 years                                                                                   | 45                               | 32                                 |
|                                                                                              | Percentage (%) of Available Data | Total Number of Available Patients |
| Patients with reportedly normal creatinine clearance at the onset of disease                 | 65                               | 103                                |
| Patients with family history of kidney disease                                               | 16                               | 193                                |
| History of smoking                                                                           | 43                               | 127                                |
| Frequent NSAID use                                                                           | 12                               | 121                                |

193 individuals from 179 families had exome sequencing performed but data was not available for all participants. Number of individuals in which data is available or satisfying the criteria is indicated in the last column. NSAID = non-steroid anti-inflammatory drug.

Supplemental material is neither peer-reviewed nor thoroughly edited by CJASN. The authors alone are responsible for the accuracy and presentation of the material.

**Supplementary Table 2. List of Genes Associated with FSGS and Related Phenotypes.**

| Gene                                      | Inheritance | Accession ID | Mean Depth of Coverage across All Samples |
|-------------------------------------------|-------------|--------------|-------------------------------------------|
| FSGS/steroid-resistant nephrotic syndrome |             |              |                                           |
| <i>ACTN4</i>                              | AD          | NM_004924    | 57X                                       |
| <i>ADCK4</i>                              | AR          | NM_024876    | 54X                                       |
| <i>ALG1</i>                               | AR          | NM_019109    | 59X                                       |
| <i>ALG13</i>                              | XLR         | NM_018466    | 49X                                       |
| <i>ANLN</i>                               | AD          | NM_018685    | 83X                                       |
| <i>APOL1</i>                              | assoc.      | NM_003661    | 94X                                       |
| <i>ARHGAP24</i>                           | AD          | NM_031305    | 87X                                       |
| <i>ARHGDI1</i>                            | AR          | NM_004309    | 70X                                       |
| <i>AVIL</i>                               | AR          | NM_006576    | 79X                                       |
| <i>CD151</i>                              | AR          | NM_004357    | 54X                                       |
| <i>CD2AP</i>                              | AD/AR       | NM_012120    | 62X                                       |
| <i>CFH</i>                                | AR          | NM_000186    | 103X                                      |
| <i>COL4A3</i>                             | AD/AR       | NM_000091    | 61X                                       |
| <i>COL4A4</i>                             | AD/AR       | NM_000092    | 63X                                       |
| <i>COL4A5</i>                             | X-linked    | NM_033380    | 35X                                       |
| <i>COQ2</i>                               | AR          | NM_015697    | 59X                                       |
| <i>COQ6</i>                               | AR          | NM_182476    | 67X                                       |
| <i>CRB2</i>                               | AR          | NM_173689    | 44X                                       |
| <i>CUBN</i>                               | AR          | NM_001081    | 77X                                       |
| <i>DGKE</i>                               | AR          | NM_003647    | 75X                                       |
| <i>E2F3</i>                               | AD          | NM_001949    | 74X                                       |
| <i>EMP2</i>                               | AR          | NM_001424    | 53X                                       |
| <i>INF2</i>                               | AD          | NM_032714    | 45X                                       |
| <i>ITGA3</i>                              | AR          | NM_002204    | 73X                                       |
| <i>ITGB4</i>                              | AR          | NM_000213    | 64X                                       |
| <i>KANK1</i>                              | AR          | NM_015158    | 82X                                       |
| <i>KANK2</i>                              | AR          | NM_015493    | 71X                                       |
| <i>KANK4</i>                              | AR          | NM_181712    | 75X                                       |
| <i>LAGE3</i>                              | AR          | NM_006014    | 29X                                       |
| <i>LAMA5</i>                              | AR          | NM_005560    | 41X                                       |
| <i>LAMB2</i>                              | AR          | NM_002292    | 82X                                       |
| <i>LMNA</i>                               | AD          | NM_005572    | 39X                                       |
| <i>LMX1B</i>                              | AD          | NM_002316    | 47X                                       |
| <i>MAGI2</i>                              | AR          | NM_012301    | 67X                                       |

Supplemental material is neither peer-reviewed nor thoroughly edited by CJASN. The authors alone are responsible for the accuracy and presentation of the material.

|                 |       |              |      |
|-----------------|-------|--------------|------|
| <i>MYH9</i>     | AD    | NM_002473    | 60X  |
| <i>MYO1E</i>    | AR    | NM_004998    | 78X  |
| <i>NPHS1</i>    | AR    | NM_004646    | 55X  |
| <i>NPHS2</i>    | AR    | NM_014625    | 70X  |
| <i>NUP107</i>   | AR    | NM_020401    | 75X  |
| <i>NUP205</i>   | AR    | NM_015135    | 85X  |
| <i>NUP93</i>    | AR    | NM_014669    | 85X  |
| <i>NXF5</i>     | XLR   | NM_032946    | 82X  |
| <i>OCRL</i>     | XLR   | NM_000276    | 67X  |
| <i>OSGEP</i>    | AR    | NM_017807    | 77X  |
| <i>PAX2</i>     | AD    | NM_003990    | 77X  |
| <i>PDSS2</i>    | AR    | NM_020381    | 71X  |
| <i>PLCE1</i>    | AR    | NM_016341    | 92X  |
| <i>PMM2</i>     | AR    | NM_000303    | 84X  |
| <i>PODXL</i>    | AD    | NM_005397    | 61X  |
| <i>PTPRO</i>    | AR    | NM_030667    | 80X  |
| <i>SCARB2</i>   | AR    | NM_005506    | 68X  |
| <i>SGPL1</i>    | AR    | NM_003901    | 82X  |
| <i>SMARCAL1</i> | AR    | NM_014140    | 80X  |
| <i>SYNPO</i>    | AD    | NM_007286    | 56X  |
| <i>TP53RK</i>   | AR    | NM_033550    | 47X  |
| <i>TPRKB</i>    | AR    | NM_016058    | 49X  |
| <i>TRPC6</i>    | AD    | NM_004621    | 75X  |
| <i>WDR73</i>    | AR    | NM_032856    | 79X  |
| <i>WT1</i>      | AD    | NM_024426    | 47X  |
| <i>XPO5</i>     | AR    | NM_020750    | 84X  |
| <i>ZMPSTE24</i> | AR    | NM_005857    | 88X  |
| CAKUT           |       |              |      |
| <i>BMP4</i>     | AD    | NM_130850    | 82X  |
| <i>BMP7</i>     | AR    | NM_001719    | 54X  |
| <i>CHD1L</i>    | AD    | NM_004284    | 79X  |
| <i>DSTYK</i>    | AD    | NM_015375    | 78X  |
| <i>EYA1</i>     | AD    | NM_172059    | 84X  |
| <i>FGF20</i>    | AR    | NM_019851    | 75X  |
| <i>FOXC1</i>    | AD    | NM_001453    | 23X  |
| <i>FRAS1</i>    | AD/AR | NM_025074    | 78X  |
| <i>FREM2</i>    | AD/AR | NM_207361    | 102X |
| <i>GATA3</i>    | AD    | NM_002051    | 83X  |
| <i>GREB1L</i>   | AD    | NM_001142966 | 88X  |
| <i>GRIP1</i>    | AR    | NM_021150    | 79X  |
| <i>HNF1B</i>    | AD    | NM_000458    | 64X  |

Supplemental material is neither peer-reviewed nor thoroughly edited by CJASN. The authors alone are responsible for the accuracy and presentation of the material.

|                  |        |              |      |
|------------------|--------|--------------|------|
| <i>ITGA8</i>     | AR     | NM_003638    | 75X  |
| <i>RET</i>       | AD     | NM_020630    | 62X  |
| <i>ROBO2</i>     | AD     | NM_002942    | 73X  |
| <i>SALL1</i>     | AD     | NM_002968    | 86X  |
| <i>SIX1</i>      | AD     | NM_005982    | 67X  |
| <i>SIX5</i>      | AD     | NM_175875    | 26X  |
| <i>SLIT2</i>     | AR     | NM_004787    | 74X  |
| <i>SOX17</i>     | AD     | NM_022454    | 43X  |
| <i>SRGAP1</i>    | AD     | NM_020762    | 81X  |
| <i>TNXB</i>      | AD     | NM_032470    | 36X  |
| <i>TRAP1</i>     | AR     | NM_016292    | 73X  |
| <i>UPK3A</i>     | AD     | NM_006953    | 48X  |
| <i>WNT4</i>      | AD     | NM_030761    | 86X  |
| Nephronophthisis |        |              |      |
| <i>ANKS6</i>     | AR     | NM_173551    | 49X  |
| <i>CCDC41</i>    | AR     | NM_016122    | 62X  |
| <i>CEP164</i>    | AR     | NM_014956    | 53X  |
| <i>CEP290</i>    | AR     | NM_025114    | 52X  |
| <i>DCDC2</i>     | AR     | NM_016356    | 89X  |
| <i>GLIS2</i>     | AR     | NM_032575    | 50X  |
| <i>IFT172</i>    | AR     | NM_015662    | 66X  |
| <i>INVS</i>      | AR     | NM_183245    | 93X  |
| <i>IQCB1</i>     | AR     | NM_001023571 | 56X  |
| <i>MAPKBP1</i>   | AR     | NM_014994    | 70X  |
| <i>NEK8</i>      | AR     | NM_178170    | 75X  |
| <i>NPHP1</i>     | AR     | NM_000272    | 81X  |
| <i>NPHP3</i>     | AR     | NM_153240    | 74X  |
| <i>NPHP4</i>     | AR     | NM_015102    | 62X  |
| <i>RPGRIP1L</i>  | AR     | NM_015272    | 80X  |
| <i>SDCCAG8</i>   | AR     | NM_006642    | 76X  |
| <i>TMEM67</i>    | AR     | NM_153704    | 50X  |
| <i>TTC21B</i>    | AD/AR  | NM_024753    | 68X  |
| <i>WDR19</i>     | AR     | NM_025132    | 85X  |
| <i>ZNF423</i>    | AD/AR  | NM_015069    | 109X |
| Other            |        |              |      |
| <i>CLCN5</i>     | XLR    | NM_000084    | 66X  |
| <i>UMOD</i>      | assoc. | NM_003361    | 57X  |

**Supplementary Table 3. Likely Pathogenic Variants in COL4A Genes.**

| Patient #<br>(Family ID)                 | Sex | Ethnicity | Age at<br>Disease<br>Onset | Age at<br>kidney<br>failure | Exon<br>(Intron)<br>Number | Nucleotide Change  | Protein Effect           | Allele<br>Frequency | Zygotity | References   |
|------------------------------------------|-----|-----------|----------------------------|-----------------------------|----------------------------|--------------------|--------------------------|---------------------|----------|--------------|
| Likely Pathogenic <i>COL4A3</i> Variants |     |           |                            |                             |                            |                    |                          |                     |          |              |
| 2378 (s)                                 | M   | EUR       | 22                         | 23                          | 29                         | c.2172delA         | Gly724fs                 | 0                   | Het      |              |
| 7939 (s)                                 | F   | EUR       | 29                         | n/a (33)                    | 1                          | c.84delC           | Ser28fs                  | 0                   | Het      |              |
| Likely Pathogenic <i>COL4A4</i> Variants |     |           |                            |                             |                            |                    |                          |                     |          |              |
| 7505 (F29)                               | F   | EAS       | 24                         | n/a (40)                    | 10                         | c.603G>A           | Trp201stop               | 0                   | Het      |              |
| 2526 (s)                                 | M   | EUR       | Unk                        | 45                          | 8                          | c.509G>A           | Gly170Glu                | 0                   | Het      | <sup>1</sup> |
| 2566 (s)                                 | M   | EUR       | 21                         | 53                          | (25)                       | c.1988-2A>C        | Disrupts splice acceptor | 0                   | Het      |              |
| 2687 (s)                                 | F   | EUR       | 23                         | 42                          | (26)                       | c.2057-1G>A        | Disrupts splice acceptor | 0                   | Het      |              |
| Likely Pathogenic <i>COL4A5</i> Variants |     |           |                            |                             |                            |                    |                          |                     |          |              |
| 2545 (s)                                 | F   | EUR       | Unk                        | Unk                         | (9)                        | c.545_546+2delAAgt | Affects splicing         | 0                   | Het      |              |

The following minor allele frequency (MAF) cut-offs as determined in gnomAD (<http://gnomad.broadinstitute.org/>) were used for dominant and recessive disease genes respectively: 0.00005 and 0.005 (accessed 2018 Feb 22). (F) designates family pedigree number while (s) indicates a sporadic case. Het indicates heterozygous. References indicate previously reported pathogenic variants affecting the same codon. Age at kidney failure was indicated as n/a for patients without kidney failure, followed by their age at time of analysis in parentheses. Unk indicates that data were unavailable. EUR indicates European while EAS indicates East Asian. The *COL4A5* mutation in 2545 was predicted to affect splicing at the wild-type donor site by Human Splicing Finder 3.1 (<http://www.umd.be/HSF3/>).

**Supplementary Table 4. Likely Pathogenic Variants in non-COL4A Genes.**

| Patient # (Family ID)                            | Sex | Ethnicity | Age at Disease Onset | Age at kidney failure | Gene Symbol   | Inheritance | Exon (Intron) Number | Nucleotide Change | Protein Effect           | Allele Frequency | Zygosity | References   |
|--------------------------------------------------|-----|-----------|----------------------|-----------------------|---------------|-------------|----------------------|-------------------|--------------------------|------------------|----------|--------------|
| <b>Likely Pathogenic Podocyte Gene Variants</b>  |     |           |                      |                       |               |             |                      |                   |                          |                  |          |              |
| 2202 (F2)                                        | F   | EUR       | 11                   | 12                    | <i>TRPC6</i>  | AD          | 2                    | c.326G>A          | Gly109Asp                | 0                | Het      | <sup>2</sup> |
| 2195 (F2)                                        | F   | EUR       | 26                   | 32                    | <i>TRPC6</i>  | AD          | 2                    | c.326G>A          | Gly109Asp                | 0                | Het      | <sup>2</sup> |
| 2469 (F3)                                        | F   | EUR       | 24                   | 47                    | <i>PODXL</i>  | AD          | 7                    | c.1376_1379del    | Lys459fs                 | 0                | Het      |              |
| 2470 (F3)                                        | F   | EUR       | 7                    | 23                    | <i>PODXL</i>  | AD          | 7                    | c.1376_1379del    | Lys459fs                 | 0                | Het      |              |
| 2504 (s)                                         | F   | EUR       | 27                   | 36                    | <i>TRPC6</i>  | AD          | 2                    | c.523C>T          | Arg175Trp                | 0                | Het      | <sup>3</sup> |
| 2572 (s)                                         | M   | EUR       | 17                   | 24                    | <i>INF2</i>   | AD          | 4                    | c.542T>C          | Val181Ala                | 0                | Het      | <sup>4</sup> |
| 7939 (s)                                         | F   | EUR       | 29                   | n/a (33)              | <i>LMX1B</i>  | AD          | 6                    | c.879delG         | Leu293fs                 | 0                | Het      |              |
| <b>Likely Pathogenic CAKUT Gene Variants</b>     |     |           |                      |                       |               |             |                      |                   |                          |                  |          |              |
| 1791 (s)                                         | M   | EUR       | 21                   | Unk                   | <i>BMP4</i>   | AD          | 4                    | c.774dupA         | Pro259fs                 | 0                | Het      |              |
| 2653 (s)                                         | F   | EUR       | 28                   | 37                    | <i>PAX2</i>   | AD          | 3                    | c.369_370insTA    | Ile123fs                 | 0                | Het      |              |
| 7535 (s)                                         | F   | EUR       | Unk                  | Unk                   | <i>EYA1</i>   | AD          | 14                   | c.1318C>T         | Arg440Trp                | 2.44E-05         | Het      | <sup>5</sup> |
| <b>Likely Pathogenic Variants in Other Genes</b> |     |           |                      |                       |               |             |                      |                   |                          |                  |          |              |
| 7019 (s)                                         | M   | EUR       | Unk                  | Unk                   | <i>CLCN5</i>  | AR          | 10                   | c.1535G>T         | Gly512Val                | 0                | Hemi     | <sup>6</sup> |
| 7276 (s)                                         | M   | EUR       | 27                   | n/a (32)              | <i>LAMA5</i>  | AR          | (45)                 | c.6065-1G>T       | Disrupts splice acceptor | 0                | Homo     |              |
| 7902 (s)                                         | F   | EUR       | 33                   | n/a (43)              | <i>CEP290</i> | AR          | 54                   | c.7346C>A         | Ser2449stop              | 0                | Homo     |              |

The following minor allele frequency (MAF) cut-offs as determined in gnomAD (<http://gnomad.broadinstitute.org/>) were used for dominant and recessive disease genes respectively: 0.00005 and 0.005 (accessed 2018 Feb 22). (F) designates family pedigree number while (s) indicates a sporadic case. Het indicates heterozygous, hemi indicates hemizygous, and homo indicates homozygous. References indicate previously reported pathogenic variants affecting the same codon. Age at kidney failure was indicated as n/a for patients without kidney failure, followed by their age at time of analysis in parentheses. Unk indicates that data were unavailable. EUR indicates European. 2195 and 2202 are mother and daughter; 2469 and 2470 are mother and daughter.



**Supplementary Table 5. Possibly Pathogenic Variants.**

| Patient # (Family ID)                      | Sex | Ethnicity | Age at Disease Onset | Age at ESRD | Gene Symbol  | Inheritance | Exon (Intron) Number | Nucleotide Change                    | Protein Effect                             | Allele Frequency | Zygosity | References    |
|--------------------------------------------|-----|-----------|----------------------|-------------|--------------|-------------|----------------------|--------------------------------------|--------------------------------------------|------------------|----------|---------------|
| Possibly Pathogenic Podocyte Gene Variants |     |           |                      |             |              |             |                      |                                      |                                            |                  |          |               |
| 7482 (F28)                                 | M   | EAS       | 28                   | n/a (36)    | <i>TRPC6</i> | AD          | 2                    | c.643C>T                             | Arg215Trp                                  | 8.15E-06         | Het      | <sup>7</sup>  |
| 2475 (s)                                   | F   | EUR       | 29                   | 32          | <i>WT1</i>   | AD          | 8                    | c.1312C>T                            | Leu438Phe                                  | 0                | Het      |               |
| 6699 (s)                                   | F   | EUR       | 32                   | n/a (50)    | <i>WT1</i>   | AD          | 10                   | c.1502G>A                            | Arg501His                                  | 0                | Het      |               |
| 7276 (s)                                   | M   | EUR       | 27                   | n/a (32)    | <i>INF2</i>  | AD          | 3                    | c.500A>C                             | His167Pro                                  | 0                | Het      |               |
| 7938 (s)                                   | M   | EUR       | 33                   | n/a (53)    | <i>WT1</i>   | AD          | 7                    | c.1099G>T                            | Asp367Tyr                                  | 0                | Het      |               |
| Possibly Pathogenic CAKUT Gene Variants    |     |           |                      |             |              |             |                      |                                      |                                            |                  |          |               |
| 2583 (s)                                   | M   | EUR       | 23                   | 42          | <i>PAX2</i>  | AD          | 4                    | c.413T>A                             | Ile138Asn                                  | 0                | Het      |               |
| 2639 (s)                                   | M   | EAS       | 18                   | 36          | <i>PAX2</i>  | AD          | 3                    | c.275C>T                             | Thr92Met                                   | 0                | Het      |               |
| Potentially Compound Heterozygous Variants |     |           |                      |             |              |             |                      |                                      |                                            |                  |          |               |
| 2698 (s)                                   | F   | Admixed   | 51                   | 68          | <i>CD2AP</i> | AR          | 8                    | c.902A>T                             | Lys301Met                                  | 1.77E-04         | Het      | <sup>8</sup>  |
|                                            |     |           |                      |             |              |             | 3                    | c.274G>A                             | Ala92Thr                                   | 0                | Het      |               |
| 2708 (s)                                   | M   | Admixed   | 40                   | Unk         | <i>ANKS6</i> | AR          | 6                    | c.1322A>G                            | Gln441Arg                                  | 6.83E-04         | Het      | <sup>9</sup>  |
|                                            |     |           |                      |             |              |             | 10                   | c.1883C>T                            | Ser628Phe                                  | 2.26E-04         | Het      |               |
| 2758 (s)                                   | M   | EUR       | 4                    | n/a (20)    | <i>NUP93</i> | AR          | 11                   | c.1162C>T                            | Arg388Trp                                  | 8.23E-04         | Het      | <sup>10</sup> |
|                                            |     |           |                      |             |              |             | 17                   | c.2065T>A                            | Phe689Ile                                  | 0                | Het      |               |
| 7596 (s)                                   | F   | EUR       | 2                    | n/a (19)    | <i>CUBN</i>  | AR          | 45                   | c.6928_6934delT AACCTC               | Glu2310Cysfs                               | 1.77E-04         | Het      | <sup>11</sup> |
|                                            |     |           |                      |             |              |             | 51                   | c.7968_7969delinsGTTATATAA GGTATAACA | Leu2656_Pro2657delinsPheValIleProTyrIleThr | 3.61E-05         | Het      |               |

The following minor allele frequency (MAF) cut-offs as determined in gnomAD (<http://gnomad.broadinstitute.org/>) were used for dominant and recessive disease genes respectively: 0.00005 and 0.005 (accessed 2018 Feb 22). (F) designates family pedigree number while (s) indicates a sporadic case. Het indicates heterozygous. References indicate previous reports of the variant. Age at kidney failure was indicated as n/a for patients without kidney failure, followed by their age at time of analysis in parentheses. Unk indicates that data were unavailable. EUR indicates European while EAS indicates East Asian.

**Supplementary Table 6. Previously Reported Variants with Uncertain Pathogenic Significance.**

| Patient # (Family ID) | Sex | Ethnicity | Age at Disease Onset | Age at Kidney Failure | Gene Symbol     | Inheritance | Exon (Intron) Number | Nucleotide Change    | Protein Effect           | Allele Frequency | Zygoty | References |
|-----------------------|-----|-----------|----------------------|-----------------------|-----------------|-------------|----------------------|----------------------|--------------------------|------------------|--------|------------|
| 1613 (F1)             | M   | EUR       | 24                   | 42                    | <i>NUP93</i>    | AR          | 11                   | c.1162C>T            | Arg388Trp                | 8.23E-04         | Het    | 10         |
| 2517 (F4)             | M   | Admixed   | Unk                  | 14                    | <i>ZMPSTE24</i> | AR          | 7                    | c.794A>G             | Asn265Ser                | 1.22E-05         | Het    | 12         |
| 6463 (F13)            | F   | EUR       | Unk                  | Unk                   | <i>TTC21B</i>   | AR          | 14                   | c.1697A>G            | His566Arg                | 6.68E-04         | Het    | 13         |
| 5772 (s)              | F   | Admixed   | 44                   | 61                    | <i>NPHS1</i>    | AR          | 12                   | c.1610C>T            | Thr537Met                | 9.68E-04         | Het    | 14         |
| 7291 (s)              | M   | Admixed   | 38                   | n/a (50)              | <i>COQ2</i>     | AR          | 5                    | c.890A>G             | Tyr297Cys                | 4.11E-06         | Het    | 15         |
| 7596 (s)              | F   | EUR       | 2                    | n/a (19)              | <i>NPHS1</i>    | AR          | 14                   | c.1868G>T            | Cys623Phe                | 3.61E-05         | Het    | 14         |
| 7982 (s)              | M   | EUR       | 40                   | n/a (64)              | <i>NPHP3</i>    | AR          | (8)                  | c.2694-2_2694-1delAG | Disrupts splice acceptor | 2.78E-04         | Het    | 16         |

The following minor allele frequency (MAF) cut-offs as determined in gnomAD (<http://gnomad.broadinstitute.org/>) were used for dominant and recessive disease genes respectively: 0.00005 and 0.005 (accessed 2018 Feb 22). (F) designates family pedigree number while (s) indicates a sporadic case. Het indicates heterozygous. References indicate previous reports of the variant. Age at kidney failure was indicated as n/a for patients without kidney failure, followed by their age at time of analysis in parentheses. Unk indicates that data were unavailable. EUR indicates European. 2517 has an additional pathogenic variant in *LMX1B* (c.668G>A, p.R223Q). 7596 has additional possibly pathogenic variants in *CUBN* (c.6928\_6934delTAACCTC, p.E2310Cfs; c.7968\_7969delinsGTTATATAAGGTATAACA, p.L2656\_P2657delinsFVIPYIT).

**Supplementary Table 7. Additional Clinical Characteristics for Patient Subgroups.**

|                                                                       | COL4A<br>(n=12) | Other<br>genetic<br>(n=12) | Non-proven<br>genetic<br>(n=169) |
|-----------------------------------------------------------------------|-----------------|----------------------------|----------------------------------|
| <b>Age of onset of kidney disease (years)</b>                         |                 |                            |                                  |
| 0-12                                                                  | 10              | 12                         | 10                               |
| 12-18                                                                 | 0               | 13                         | 6                                |
| >18                                                                   | 90              | 75                         | 84                               |
| <b>Ethnicity</b>                                                      |                 |                            |                                  |
| European                                                              | 92              | 50                         | 64                               |
| African                                                               | 0               | 0                          | 4                                |
| East Asian                                                            | 0               | 25                         | 12                               |
| Admixed                                                               | 8               | 25                         | 20                               |
| <b>Proteinuria at onset</b>                                           |                 |                            |                                  |
| Dipstick positive                                                     | 25              | 38                         | 32                               |
| 300 mg-2 g/ 24 hours                                                  | 13              | 12                         | 12                               |
| > 2 g/24 hours                                                        | 62              | 50                         | 56                               |
| <b>Nadir plasma albumin (g/dl)</b>                                    |                 |                            |                                  |
| >35                                                                   | 57              | 27                         | 44                               |
| 30-34                                                                 | 14              | 43                         | 18                               |
| 25-29                                                                 | 29              | 15                         | 12                               |
| 20-24                                                                 | 0               | 15                         | 8                                |
| <19                                                                   | 0               | 0                          | 18                               |
| Normal creatinine clearance at disease onset                          | 67              | 83                         | 77                               |
| History of smoking                                                    | 50              | 25                         | 46                               |
| Frequent NSAID use                                                    | 14              | 0                          | 12                               |
| <b>FSGS histologic subtype</b>                                        |                 |                            |                                  |
| Not otherwise specified                                               | 100             | 50                         | 77                               |
| Tip                                                                   | 0               | 0                          | 9                                |
| Perihilar                                                             | 0               | 0                          | 8                                |
| Collapsing                                                            | 0               | 25                         | 2                                |
| Cellular                                                              | 0               | 0                          | 1                                |
| Inadequate                                                            | 0               | 25                         | 3                                |
| Kidney failure                                                        | 46              | 44                         | 50                               |
| <b>Number of years to kidney failure from diagnosis</b>               |                 |                            |                                  |
| < 5 years                                                             | 0               | 60                         | 23                               |
| 5-10 years                                                            | 50              | 40                         | 29                               |
| > 10 years                                                            | 50              | 0                          | 48                               |
| Kidney transplant (% of transplant in patients with kidney failure)   | 100             | 75                         | 54                               |
| Recurrence of disease after kidney transplant (within the first year) | 0               | 0                          | 13                               |
| Graft failure after one year                                          | 20              | 67                         | 32                               |

*Supplemental material is neither peer-reviewed nor thoroughly edited by CJASN. The authors alone are responsible for the accuracy and presentation of the material.*

All patients in the *COL4A* subgroup received a kidney transplant, which was significantly different from the no proven genetic basis group ( $p=0.05$ ). Numbers shown are percentages of available data. Total number of biopsies for each subgroup: COL4A (9), other genetic (4), non-proven genetic (113).

**Supplementary Table 8. Tables demonstrating ages at disease onset and estimated mean survival/age of kidney failure by subgroup, with sexes analyzed separately.**

|                          |                           |           | 95% CI |       |
|--------------------------|---------------------------|-----------|--------|-------|
|                          | Age of onset / all cohort | Std error | Lower  | Upper |
| <b>COL4A</b>             | 36                        | 3         | 29     | 42    |
| <b>Genetic</b>           | 26                        | 5         | 17     | 37    |
| <b>No proven genetic</b> | 34                        | 1         | 32     | 37    |

|                          |                             |           | 95% CI |       |
|--------------------------|-----------------------------|-----------|--------|-------|
|                          | Kidney failure / all cohort | Std error | Lower  | Upper |
| <b>COL4A</b>             | 58                          | 5         | 49     | 69    |
| <b>Genetic</b>           | 43                          | 6         | 31     | 55    |
| <b>No proven genetic</b> | 62                          | 2         | 58     | 66    |

|                          |                        |           | 95% CI |       |
|--------------------------|------------------------|-----------|--------|-------|
|                          | Age of onset / females | Std error | Lower  | Upper |
| <b>COL4A</b>             | 27                     | 4         | 19     | 35    |
| <b>Genetic</b>           | 24                     | 6         | 12     | 36    |
| <b>No proven genetic</b> | 36                     | 3         | 31     | 41    |

|                          |                          |           | 95% CI |       |
|--------------------------|--------------------------|-----------|--------|-------|
|                          | Kidney failure / females | Std error | Lower  | Upper |
| <b>COL4A</b>             | 48                       | 4         | 40     | 56    |
| <b>Genetic</b>           | NA                       | NA        | NA     | NA    |
| <b>No proven genetic</b> | 64                       | 3         | 57     | 70    |

|                          |                      |           | 95% CI |       |
|--------------------------|----------------------|-----------|--------|-------|
|                          | Age of onset / males | Std error | Lower  | Upper |
| <b>COL4A</b>             | 36                   | 4         | 27     | 44    |
| <b>Genetic</b>           | 27                   | 7         | 14     | 40    |
| <b>No proven genetic</b> | 34                   | 2         | 30     | 37    |

|                          |                        |           | 95% CI |       |
|--------------------------|------------------------|-----------|--------|-------|
|                          | Kidney failure / males | Std error | Lower  | Upper |
| <b>COL4A</b>             | 66                     | 0         | 66     | 66    |
| <b>Genetic</b>           | 33                     | 8         | 17     | 48    |
| <b>No proven genetic</b> | 63                     | 3         | 57     | 70    |

Genetic refers to other genetic causes not including *COL4A*. For *COL4A* subgroup, only one male patient developed kidney failure at last follow up. No females in the other genetic group developed kidney failure at last follow up. There were no statistically significant differences between males and females in any pairwise comparison. Std error = standard error; CI = confidence interval; NA = not applicable.

Supplemental material is neither peer-reviewed nor thoroughly edited by CJASN. The authors alone are responsible for the accuracy and presentation of the material.

**Supplementary Table 9. Clinical characteristics of COL4A, other genetic cause and no proven genetic cause subgroups.**

|                                                                                             | COL4A<br>(12) | Other<br>genetic<br>(12) | No proven<br>genetic<br>(169) |
|---------------------------------------------------------------------------------------------|---------------|--------------------------|-------------------------------|
| % male                                                                                      | 5/12          | 8/12                     | 98/169                        |
| Mean age of onset of kidney disease                                                         | 36            | 26                       | 34                            |
| % with hematuria                                                                            | 6/10          | 2/8                      | 20/70                         |
| % of patients with family history of kidney disease                                         | 5/11          | 4/9                      | 19/155                        |
| % partial remission                                                                         | 2/7           | 3/10                     | 25/95                         |
| % complete remission                                                                        | 0/7           | 0/10                     | 19/95                         |
| % no remission                                                                              | 1/7           | 2/10                     | 14/95                         |
| % unknown status of remission                                                               | 4/7           | 5/10                     | 37/95                         |
| % kidney failure                                                                            | 5/11          | 4/9                      | 63/127                        |
| % with only global glomerulosclerosis on light microscopy                                   | 1/9           | 2/4                      | 10/113                        |
| % glomerular basement membrane abnormalities on electron microscopy                         | 5/9           | 1/4                      | 30/113                        |
| % with >50% podocyte foot process effacement on electron microscopy                         | 9/9           | 3/4                      | 81/113                        |
| Number of patients where pathology report with electron microscopy description is available | 9             | 4                        | 113                           |
| Mean age at kidney failure (years)                                                          | 58            | 43                       | 62                            |
| % kidney transplant in patients with kidney failure                                         | 5/5           | 3/4                      | 34/63                         |
| % of recurrence of disease after kidney transplant (within the first year)                  | 0/5           | 0/3                      | 4/31                          |

Absolute numbers presented. Denominator represents number of individuals for which data is available.

Supplemental material is neither peer-reviewed nor thoroughly edited by CJASN. The authors alone are responsible for the accuracy and presentation of the material.

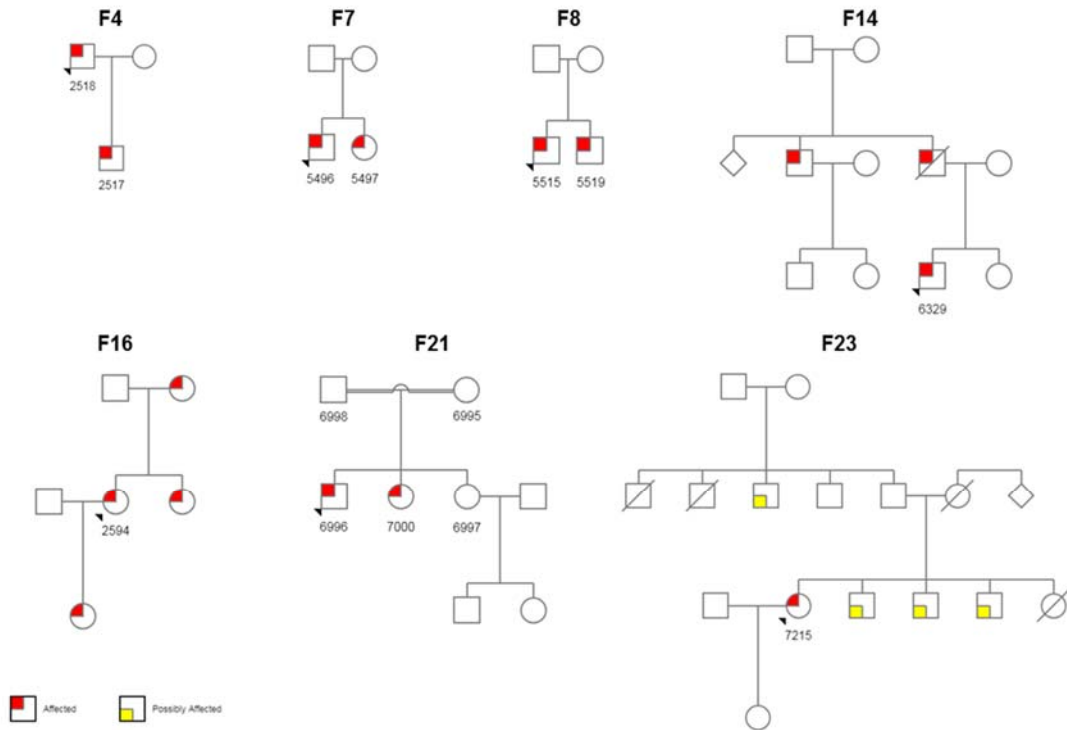

**Supplementary Figure 1. Pedigrees of families with definitely pathogenic variants.** In F21, 6996 has a likely pathogenic variant (*NPHS1* R976S) while other samples have not been tested yet. In all other families shown, individuals with ID's are known to have the respective pathogenic variant. Pedigree information is not available for F9. Arrows indicate probands.

## SUPPLEMENTARY REFERENCES

1. Morinière, V, Dahan, K, Hilbert, P, Lison, M, Lebbah, S, Topa, A, Bole-Feysot, C, Pruvost, S, Nitschke, P, Plaisier, E, Knebelmann, B, Macher, M-A, Noel, L-H, Gubler, M-C, Antignac, C, Heidet, L: Improving Mutation Screening in Familial Hematuric Nephropathies through Next Generation Sequencing. *J Am Soc Nephrol*, 25: 2740-2751, 2014.
2. Santín, S, Ars, E, Rossetti, S, Salido, E, Silva, I, García-Maset, R, Giménez, I, Ruíz, P, Mendizábal, S, Nieto, JL, Peña, A, Camacho, JA, Graga, G, Cobo, MÁ, Bernis, C, Ortiz, A, de Pablos, AL, Sánchez-Moreno, A, Pintos, G, Mirapeix, E, Fernández-Llama, P, Ballarín, J, Torra, R: TRPC6 mutational analysis in a large cohort of patients with focal segmental glomerulosclerosis. *Nephrol Dial Transplant*, 24: 3089-3096, 2009.
3. Hofstra, JM, Lainez, S, van Kuijk, WHM, Schoots, J, Baltissen, MPA, Hoefsloot, LH, Knoers, NV, Berden, JHM, Bindels, RJM, van der Vlag, J, Hoenderop, JGJ, Wetzels, JFM, Nijenhuis, T: New TRPC6 gain-of-function mutation in a non-consanguineous Dutch family with late-onset focal segmental glomerulosclerosis. *Nephrol Dial Transplant*, 28: 1830-1838, 2013.
4. Barua, M, Brown, EJ, Charoonratana, VT, Genovese, G, Sun, H, Pollak, MR: Mutations in the INF2 gene account for a significant proportion of familial but not sporadic focal and segmental glomerulosclerosis. *Kidney Int*, 83: 316-322, 2013.
5. Li, Y, Manaligod, JM, Weeks, DL: EYA1 mutations associated with the branchio-oto-renal syndrome result in defective otic development in *Xenopus laevis*. *Biology of the Cell*, 102: 277-292, 2010.
6. Lloyd, SE, Gunther, W, Pearce, SH, Thomson, A, Bianchi, ML, Bosio, M, Craig, IW, Fisher, SE, Scheinman, SJ, Wrong, O, Jentsch, TJ, Thakker, RV: Characterisation of renal chloride channel, CLCN5, mutations in hypercalciuric nephrolithiasis (kidney stones) disorders. *Human Molecular Genetics*, 6: 1233-1239, 1997.
7. Mallett, AJ, McCarthy, HJ, Ho, G, Holman, K, Farnsworth, E, Patel, C, Fletcher, JT, Mallawaarachchi, A, Quinlan, C, Bennetts, B, Alexander, SI: Massively parallel sequencing and targeted exomes in familial kidney disease can diagnose underlying genetic disorders. *Kidney Int*, 92: 1493-1506, 2017.
8. Gigante, M, Pontrelli, P, Montemurno, E, Roca, L, Aucella, F, Penza, R, Caridi, G, Ranieri, E, Ghiggeri, GM, Gesualdo, L: CD2AP mutations are associated with sporadic nephrotic syndrome and focal segmental glomerulosclerosis (FSGS). *Nephrol Dial Transplant*, 24: 1858-1864, 2009.
9. Hoff, S, Halbritter, J, Epting, D, Frank, V, Nguyen, TM, van Reeuwijk, J, Boehlke, C, Schell, C, Yasunaga, T, Helmstädter, M, Mergen, M, Filhol, E, Boldt, K, Horn, N, Ueffing, M, Otto, EA, Eisenberger, T, Elting, MW, van Wijk, JA, Bockenhauer, D, Sebire, NJ, Rittig, S, Vyberg, M, Ring, T, Pohl, M, Pape, L, Neuhaus, TJ, Elshakhs, NA, Koon, SJ, Harris, PC, Grahammer, F, Huber, TB, Kuehn, EW, Kramer-Zucker, A, Bolz, HJ, Roepman, R, Saunier, S, Walz, G, Hildebrandt, F, Bergmann, C, Lienkamp, SS: ANKS6 is a central component of a nephronophthisis module linking NEK8 to INVS and NPHP3. *Nature genetics*, 45: 951-956, 2013.
10. Braun, DA, Sadowski, CE, Kohl, S, Lovric, S, Astrinidis, SA, Pabst, WL, Gee, HY, Ashraf, S, Lawson, JA, Shril, S, Airik, M, Tan, W, Schapiro, D, Rao, J, Choi, WI, Hermle, T, Kemper, MJ, Pohl, M, Ozaltin, F, Konrad, M, Bogdanovic, R, Büscher, R, Helmchen, U, Serdaroglu, E, Lifton, RP, Antonin, W, Hildebrandt, F: Mutations in nuclear pore genes



- NUP93, NUP205 and XPO5 cause steroid-resistant nephrotic syndrome. *Nature genetics*, 48: 457-465, 2016.
11. Sadowski, CE, Lovric, S, Ashraf, S, Pabst, WL, Gee, HY, Kohl, S, Engelmann, S, Vega-Warner, V, Fang, H, Halbritter, J, Somers, MJ, Tan, W, Shril, S, Fessi, I, Lifton, RP, Bockenhauer, D, El Desoky, S, Kari, JA, Zenker, M, Kemper, MJ, Mueller, D, Fathy, HM, Soliman, NA, SRNS Study Group, Hildebrandt, F: A single-gene cause in 29.5% of cases of steroid-resistant nephrotic syndrome. *J Am Soc Nephrol*, 26: 1279-1289, 2015.
  12. Agarwal, AK, Zhou, XJ, Hall, RK, Nicholls, K, Bankier, A, Van Esch, H, Fryns, JP, Garg, A: Focal segmental glomerulosclerosis in patients with mandibuloacral dysplasia owing to ZMPSTE24 deficiency. *Journal of Investigative Medicine*, 54: 208-213, 2006.
  13. Davis, EE, Zhang, Q, Liu, Q, Diplas, BH, Davey, LM, Hartley, J, Stoetzel, C, Szymanska, K, Ramaswami, G, Logan, CV, Muzny, DM, Young, AC, Wheeler, DA, Cruz, P, Morgan, M, Lewis, LR, Cherukuri, P, Maskeri, B, Hansen, NF, Mullikin, JC, Blakesley, RW, Bouffard, GG, NISC Comparative Sequencing Program, Gyapay, G, Rieger, S, Tönshoff, B, Kern, I, Soliman, NA, Neuhaus, TJ, Swoboda, KJ, Kayserili, H, Gallagher, TE, Lewis, RA, Bergmann, C, Otto, EA, Saunier, S, Scambler, PJ, Beales, PL, Gleeson, JG, Maher, ER, Attié-Bitach, T, Dollfus, H, Johnson, CA, Green, ED, Gibbs, RA, Hildebrandt, F, Pierce, EA, Katsanis, N: TTC21B contributes both causal and modifying alleles across the ciliopathy spectrum. *Nature genetics*, 43: 189-196, 2011.
  14. Santín, S, García-Maset, R, Ruíz, P, Giménez, I, Zamora, I, Peña, A, Madrid, A, Camacho, JA, Fraga, G, Sánchez-Moreno, A, Cobo, MÁ, Bernis, C, Ortiz, A, De Pablos, AL, Pintos, G, Justa, ML, Hidalgo-Barquero, E, Fernández-Llama, P, Ballarín, J, Ars, E, Torra, R, FSGS Spanish Study Group: Nephtrin mutations cause childhood- and adult-onset focal segmental glomerulosclerosis. *Kidney Int*, 76: 1268-1276, 2009.
  15. Diomedi-Camassei, F, Di Giandomenico, S, Santorelli, FM, Caridi, G, Piemonte, F, Montini, G, Ghiggeri, GM, Murer, L, Barisoni, L, Pastore, A, Muda, AO, Valente, ML, Bertini, E, Emma, F: COQ2 nephropathy: a newly described inherited mitochondriopathy with primary renal involvement. *J Am Soc Nephrol*, 18: 2773-2380, 2007.
  16. Schueler, M, Halbritter, J, Phelps, IG, Braun, DA, Otto, EA, Porath, JD, Gee, HY, Shendure, L, O'Roak, BJ, Lawson, JA, Nabhan, MM, Soliman, NA, Doherty, D, Hildebrandt, F: Large-scale targeted sequencing comparison highlights extreme genetic heterogeneity in nephronophthisis-related ciliopathies. *Journal of Medical Genetics*, 53: 208-214, 2016.
  17. Gast, C, Pengelly, RJ, Lyon, M, Bunyan, DJ, Seaby, EG, Graham, N, Venkat-Raman, G, Ennis, S: Collagen (COL4A) mutations are the most frequent mutations underlying adult focal segmental glomerulosclerosis. *Nephrol Dial Transplant*, 31: 961-970, 2016.
  18. Storey, H, Savige, J, Sivakumar, V, Abbs, S, Flinter, FA: COL4A3/COL4A4 Mutations and Features in Individuals with Autosomal Recessive Alport Syndrome. *J Am Soc Nephrol*, 24: 1945-1954, 2013.
  19. Pescucci, C, Mari, F, Longe, I, Vogiatzi, P, Caselli, R, Scala, E, Abaterusso, C, Gusmano, R, Seri, M, Miglietti, N, Bresin, E, Renieri, A: Autosomal-dominant Alport syndrome: natural history of a disease due to COL4A3 or COL4A4 gene. *Kidney Int*, 65: 1598-1603, 2004.
  20. Heidet, L, Arrondel, C, Forestier, L, Cohen-Solal, L, Mollet, G, Gutierrez, B, Stavrou, C, Gubler, M-C, Antignac, C: Structure of the human type IV collagen gene COL4A3 and mutations in autosomal Alport syndrome. *J Am Soc Nephrol*, 12: 97-106, 2001.

21. Buzza, M, Dagher, H, Yan Wang, Y, Wilson, D, Babon, JJ, Cotton, RG, Savige, J: Mutations in the COL4A4 gene in thin basement membrane disease. *Kidney Int*, 63: 447-453, 2003.
22. Dagher, H, Yan Wang, Y, Fassett, R, Savige, J: Three novel COL4A4 mutations resulting in stop codons and their clinical effects in autosomal recessive Alport syndrome. *Hum Mutat*, 20: 321-322, 2002.
23. Malone, AF, Phelan, PJ, Hall, G, Cetincelik, U, Homstad, A, Alonso, A, Jiang, R, Lindsey, T, Wu, G, Sparks, MA, Smith, SR, Webb, NJA, Kalra, P, Adeyemo, A, Shaw, AS, Conlon, PJ, Jennette, JC, Howell, DN, Winn, MP, Gbadegesin, RA: Rare hereditary COL4A3/COL4A4 variants may be mistaken for familial focal segmental glomerulosclerosis. *Kidney Int*, 86: 1253-1259, 2014.
24. Mencarelli, MA, Heidet, L, Storey, H, van Geel, M, Knebelmann, B, Fallerini, C, Miglietti, N, Antonucci, MF, Cetta, F, Sayer, JA, van den Wijngaard, A, Yau, S, Mari, F, Bruttini, M, Ariani, F, Dahan, K, Smeets, B, Antignac, C, Flinter, FA, Renieri, A: Evidence of digenic inheritance in Alport syndrome. *Journal of Medical Genetics*, 52: 163-174, 2015.
25. Barker, DF, Pruchno, CJ, Jiang, X, Atkin, CL, Stone, EM, Denison, JC, Fain, PR, Gregory, MC: A mutation causing Alport syndrome with tardive hearing loss is common in the western United States. *American Journal of Medical Genetics*, 58: 1157-1165, 1996.
26. Ma, J, Pan, X, Wang, Z, Wang, Y, Feng, X, Ren, H, Zhang, W, Chen, X, Wang, W, Chen, N: Twenty-one novel mutations identified in the COL4A5 gene in Chinese patients with X-linked Alport's syndrome confirmed by skin biopsy. *Nephrology Dialysis Transplantation*, 26: 4003-4010, 2011.
27. Nagel, M, Nagorka, S, Gross, O: Novel COL4A5, COL4A5, and COL4A3 mutations in Alport syndrome. *Human Mutation*, 26: 60, 2005.
28. Barker, DF, Denison, JC, Atkin, CL, Gregory, MC: Efficient detection of Alport syndrome COL4A5 mutations with multiplex genomic PCR-SSCP. *American Journal of Medical Genetics*, 98: 148-160, 2001.
29. Hashimura, Y, Nozu, K, Kaito, H, Nakanishi, K, Fu, XJ, Ohtsubo, H, Hashimoto, F, Oka, M, Ninchoji, T, Ishimori, S, Morisada, N, Matsunoshita, N, Kamiyoshi, N, Yoshikawa, N, Iijima, K: Milder clinical aspects of X-linked Alport syndrome in men positive for the collagen IV  $\alpha 5$  chain. *Kidney International*, 85: 1208-1213, 2014.
30. Boye, E, Flinter, FA, Zhou, J, Tryggvason, K, Bobrow, M, Harris, A: Detection of 12 novel mutations in the collagenous domain of the COL4A5 gene in Alport syndrome patients. *Human Mutation*, 5: 198-204, 1995.
31. Martin, P, Heiskari, N, Zhou, J, Leinone, A, Tumelius, T, Hertz, JM, Barker, DF, Gregory, MC, Atkin, CL, Stykarsdottir, U, Neumann, H, Springate, J, Shows, T, Pettersson, E, Tryggvason, K: High mutation detection rate in the COL4A5 collagen gene in suspected Alport syndrome using PCR and direct DNA sequencing. *Journal of the American Society of Nephrology*, 9: 2291-2301, 1998.
32. Plant, KE, Green, PM, Vetrie, D, Flinter, FA: Detection of mutations in COL4A5 in patients with Alport syndrome. *Human Mutation*, 13: 124-132, 1999.
33. Renieri, A, Bruttini, M, Galli, L, Zanelli, P, Neri, T, Rossetti, S, Turco, A, Heiskari, N, Zhou, J, Gusmano, R, Massella, L, Banfi, G, Scolari, F, Sessa, A, Rizzoni, G, Tryggvason, K, Pignatti, PF, Savi, M, Ballabio, A, De Marchi, M: X-linked Alport syndrome: an SSCP-based mutation survey over all 51 exons of the COL4A5 gene. *American Journal of Medical Genetics*, 58: 1192-1204, 1996.

34. Strasser, K, Hoefele, J, Bergmann, C, Büscher, AK, Büscher, R, Hoyer, PF, Weber, S: COL4A5-associated X-linked Alport syndrome in a female patient with early inner ear deafness due to a mutation in MYH9. *Nephrology Dialysis Transplantation*, 27: 4236-4240, 2012.
35. Weber, S, Strasser, K, Rath, S, Kittke, A, Beicht, S, Alberer, M, Lange-Sperandio, B, Hoyer, PF, Benz, MR, Ponsel, S, Weber, LT, Klein, H-G, Hoefele, J: Identification of 47 novel mutations in patients with Alport syndrome and thin basement membrane nephropathy. *Pediatric Nephrology*, 31: 941-955, 2016.
36. Adam, J, Connor, TMF, Wood, K, Lewis, D, Naik, R, Gale, DP, Sayer, JA: Genetic testing can resolve diagnostic confusion in Alport syndrome. *Clinical Kidney Journal*, 7: 197-200, 2014.
37. Inoue, Y, Nishio, H, Shirakawa, T, Nakanishi, K, Nakamura, H, Sumino, K, Nishiyama, K, Iijima, K, Yoshikawa, N: Detection of mutations in the COL4A5 gene in over 90% of male patients with X-linked Alport's syndrome by RT-PCR and direct sequencing. *American Journal of Kidney Diseases*, 34: 854-862, 1999.
38. Moyano Crespo, GD, Torres, AI, Mukdsi, JH: Crescentic and necrotising glomerulonephritis: a rare histological manifestation of Alport syndrome. *Journal of Clinical Pathology*, 68: 581-583, 2015.
39. Pont-Kingdon, G, Sumner, K, Gedge, F, Miller, C, Denison, JC, Gregory, MC, Lyon, E: Molecular testing for adult type Alport syndrome. *BMC Nephrology*, 10: 38, 2009.
40. Dreyer, SD, Morello, R, German, MS, Zabel, B, Winterpacht, A, Lunstrum, GP, Horton, WA, Oberg, KC, Lee, B: LMX1B transactivation and expression in nail-patella syndrome. *Human Molecular Genetics*, 9: 1067-1074, 2000.
41. Ghomid, J, Petit, F, Holder-Espinasse, M, Jourdain, A-S, Guerra, J, Dieux-Coeslier, A, Figeac, M, Porchet, N, Manouvrier-Hanu, S, Escande, F: Nail-Patella Syndrome: clinical and molecular data in 55 families raising the hypothesis of a genetic heterogeneity. *European Journal of Human Genetics*, 24: 44-50, 2016.
42. Hamlington, JD, Jones, C, McIntosh, I: Twenty-two Novel LMX1B Mutations Identified in Nail Patella Syndrome (NPS) Patients. *Human Mutation*, 18: 458, 2001.
43. Knoers, NV, Bongers, EM, Beersum, SE, Lommen, EJ, van Bokhoven, H, Hol, FA: Nail-patella syndrome: identification of mutations in the LMX1B gene in Dutch families. *J Am Soc Nephrol*, 11: 1762-1766, 2000.
44. McIntosh, I, Dreyer, SD, Clough, MV, Dunston, JA, Eyaid, Wa, Roig, CM, Montgomery, T, Ala-Mello, S, Kaitila, I, Winterpacht, A, Zabel, B, Frydman, M, Cole, WG, Francomano, CA, Lee, B: Mutation Analysis of LMX1B Gene in Nail-Patella Syndrome Patients. *Am J Hum Genet*, 63: 1651-1658, 1998.
45. Ashraf, S, Gee, HY, Woerner, S, Xie, LX, Vega-Warner, V, Lovric, S, Fang, H, Song, X, Cattran, DC, Avila-Casado, C, Paterson, AD, Nitschké, P, Bole-Feysot, C, Cochat, P, Esteve-Rudd, J, Haberberger, B, Allen, SJ, Zhou, W, Airik, R, Otto, EA, Barua, M, Al-Hamed, MH, Kari, JA, Evans, J, Bierzynska, A, Saleem, MA, Böckenhauer, D, Kleta, R, El Desoky, S, Hacıhamdioglu, DO, Gok, F, Washburn, J, Wiggins, RC, Choi, M, Lifton, RP, Levy, S, Han, Z, Salviati, L, Prokisch, H, Williams, DS, Pollak, M, Clarke, CF, Pei, Y, Antignac, C, Hildebrandt, F: ADCK4 mutations promote steroid-resistant nephrotic syndrome through CoQ10 biosynthesis disruption. *Journal of Clinical Investigation*, 123: 5179-5189, 2013.

46. Boyer, O, Nevo, F, Plaisier, E, Funalot, B, Gribouval, O, Benoit, G, Cong, EH, Arrondel, C, Tête, M-J, Montjean, R, Richard, L, Karras, A, Pouteil-Noble, C, Balafrej, L, Bonnardeaux, A, Canaud, G, Charasse, C, Dantal, J, Deschenes, G, Deteix, P, Dubourg, O, Petiot, P, Pouthier, D, Leguern, E, Guiochon-Mantel, A, Broutin, I, Gubler, M-C, Saunier, S, Ronco, P, Vallat, J-M, Alonso, MA, Antignac, C, Mollet, G: INF2 Mutations in Charcot–Marie–Tooth Disease with Glomerulopathy. *New England Journal of Medicine*, 365: 2377-2388, 2011.
47. Kari, JA, Montini, G, Bockenhauer, D, Brennan, E, Rees, L, Trompeter, RS, Tullus, K, van't Hoff, W, Waters, A, Ashton, E, Lench, N, Sebire, NJ, Marks, SD: Clinico-pathological correlations of congenital and infantile nephrotic syndrome over twenty years. *Pediatr Nephrol*, 29: 2173-2180, 2014.
48. Lovric, S, Fang, H, Vega-Warner, V, Sadowski, CE, Gee, HY, Halbritter, J, Ashraf, S, Saisawat, P, Soliman, NA, Kari, JA, Otto, EA, Hildebrandt, F: Rapid Detection of Monogenic Causes of Childhood-Onset Steroid-Resistant Nephrotic Syndrome. *Clinical Journal of the American Society of Nephrology*, 9: 1109-1116, 2014.
49. Machuca, E, Benoit, G, Nevo, F, Tête, M-J, Gribouval, O, Pawtowski, A, Brandström, P, Loirat, C, Niaudet, P, Gubler, M-C, Antignac, C: Genotype-phenotype correlations in non-Finnish congenital nephrotic syndrome. *Journal of the American Society of Nephrology*, 21: 1209-1217, 2010.
50. Philippe, A, Nevo, F, Esquivel, EL, Reklaityte, D, Gribouval, O, Tête, M-J, Loirat, C, Dantal, J, Fischbach, M, Pouteil-Noble, C, Decramer, S, Hoehne, M, Benzing, T, Charbit, M, Niaudet, P, Antignac, C: Nephtrin Mutations Can Cause Childhood-Onset Steroid-Resistant Nephrotic Syndrome. *J Am Soc Nephrol*, 19: 1871-1878, 2008.
51. Yang, F, Chen, Y, Zhang, Y, Qiu, L, Chen, Y, Zhou, J: Novel NPHS1 gene mutations in a Chinese family with congenital nephrotic syndrome. *Journal of Genetics*, 95: 161-166, 2016.
52. Boyer, O, Woerner, S, Yang, F, Oakeley, EJ, Linghu, B, Gribouval, O, Tête, M-J, Duca, JS, Klickstein, L, Damask, AJ, Szustakowski, JD, Heibel, F, Matignon, M, Baudouin, V, Chantrel, F, Champigneulle, J, Martin, L, Nitschké, P, Gubler, M-C, Johnson, KJ, Chibout, S-D, Antignac, C: LMX1B Mutations Cause Hereditary FSGS without Extrarenal Involvement. *J Am Soc Nephrol*, 24: 1216-1222, 2013.
53. Hall, G, Lane, B, Chryst-Ladd, M, Wu, G, Lin, J-J, Qin, X, Hauser, ER, Gbadegesin, RA: Dysregulation of WTI (–KTS) is Associated with the Kidney-Specific Effects of the LMX1B R246Q Mutation. *Scientific Reports*, 7: 39933, 2017.
54. Isojima, T, Harita, Y, Furuyama, M, Sugawara, N, Ishizuka, K, Horita, S, Kajihō, Y, Miura, K, Igarashi, T, Hattori, M, Kitanaka, S: LMX1B mutation with residual transcriptional activity as a cause of isolated glomerulopathy. *Nephrol Dial Transplant*, 29: 81-88, 2014.
55. Berdeli, A, Mir, S, Yavaskan, O, Serdaroglu, E, Bak, M, Aksu, N, Oner, A, Anarat, A, Donmez, O, Yildiz, N, Sever, L, Tabel, Y, Dusunsel, R, Sonmez, F, Cakar, N: NPHS2 (podicin) mutations in Turkish children with idiopathic nephrotic syndrome. *Pediatr Nephrol*, 22: 2031-2040, 2007.
56. Karle, SM, Uetz, B, Ronner, V, Glaeser, L, Hildebrandt, F, Fuchshuber, A: Novel Mutations in NPHS2 Detected in Both Familial and Sporadic Steroid-Resistant Nephrotic Syndrome. *J Am Soc Nephrol*, 13: 388-393, 2002.

57. Hinkes, B, Vlangos, C, Heeringa, S, Mucha, B, Gbadegesin, RA, Liu, J, Hasselbacher, K, Ozaltin, F, Hildebrandt, F: Specific podocin mutations correlate with age of onset in steroid-resistant nephrotic syndrome. *J Am Soc Nephrol*, 19: 365-371, 2008.
58. Kerti, A, Csohány, R, Szabó, A, Árkossy, O, Sallay, P, Morinière, V, Vega-Warner, V, Nyíró, G, Lakatos, O, Szabó, T, Lipska, BS, Schaefer, F, Antignac, C, Reusz, G, Tulassay, T, Tory, K: NPHS2 p.V290M mutation in late-onset steroid-resistant nephrotic syndrome. *Pediatr Nephrol*, 28: 751-757, 2013.
59. Tabatabaeifar, M, Schlingmann, K-P, Litwin, M, Emre, S, Bakkaloglu, A, Mehls, O, Antignac, C, Schaefer, F, Weber, S, Group, ET: Functional analysis of BMP4 mutations identified in pediatric CAKUT patients. *Pediatr Nephrol*, 24: 2361-2368, 2009.
60. Weber, S, Taylor, JC, Winyard, P, Baker, KF, Sullivan-Brown, J, Schild, R, Knüppel, T, Zurowska, AM, Caldas-Alfonso, A, Litwin, M, Emre, S, Ghiggeri, GM, Bakkaloglu, A, Mehls, O, Antignac, C, Network, E, Schaefer, F, Burdine, RD: SIX2 and BMP4 mutations associate with anomalous kidney development. *J Am Soc Nephrol*, 19: 891-903, 2008.
